# Supplementary material for: Cu2+-Chelating Mesoporous Silica Nanoparticles for Synergistic Chemotherapy/Chemodynamic Therapy
Source: MDPI journal article supplement (doi:10.3390/pharmaceutics14061200), 2022-06-04
Supplement: s1 [file s1]

## Supporting Information

### **Cu<sup>2+</sup>-chelating mesoporous silica nanoparticles for synergistic chemotherapy / chemodynamic therapy**

Yanyan Zhang<sup>1,†</sup>, Jiadong Lou<sup>1,†</sup>, Gareth R. Williams<sup>2</sup>, Yuhan Ye<sup>1</sup>, Dandan Ren<sup>1</sup>, Anhua Shi<sup>4</sup>,  
Junzi Wu<sup>4</sup>, Wenling Chen<sup>3,\*</sup>, Li-Min Zhu<sup>1,\*</sup>

<sup>1</sup> College of Chemistry, Chemical Engineering and Biotechnology, Donghua University, Shanghai, 201620, P. R. China; zhangyy518@163.com (Y.Z.); 847603913@qq.com (J.L.); 1294878367@qq.com (Y.Y.); 2574125897@qq.com (D.R.)

<sup>2</sup> UCL School of Pharmacy, University College London, 29-39 Brunswick Square, London, WC1N 1AX, UK; g.williams@ucl.ac.uk (G.R.W.)

<sup>3</sup> School of Clinical Medicine, Yunnan University of Chinese Medicine, Kunming, Yunnan, 650500, P. R. China

<sup>4</sup> The Key Laboratory of Microcosmic Syndrome Differentiation, Education Department of Yunnan, Yunnan University of Chinese Medicine, Kunming, Yunnan, 650500, P. R. China; 2697349858@qq.com (A.S.); xnfz@ynutcm.edu.cn (J.W.)

\* Correspondence: ynwenling09@126.com (W.C.); lzhu@dhu.edu.cn (L.-M.Z.)

<sup>†</sup>These authors contributed equally to this work.

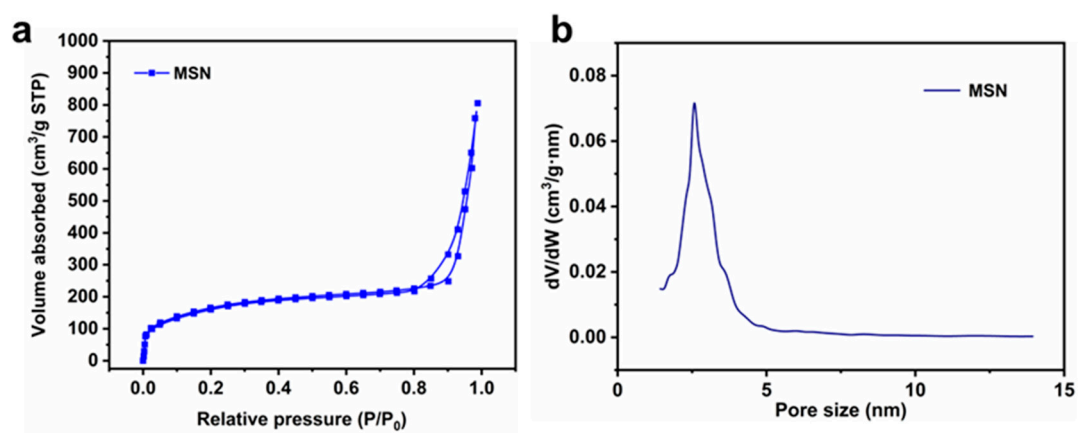

**Figure S1.** (a) N<sub>2</sub> absorption-desorption isotherms and (b) corresponding pore-size distribution of the MSNs.

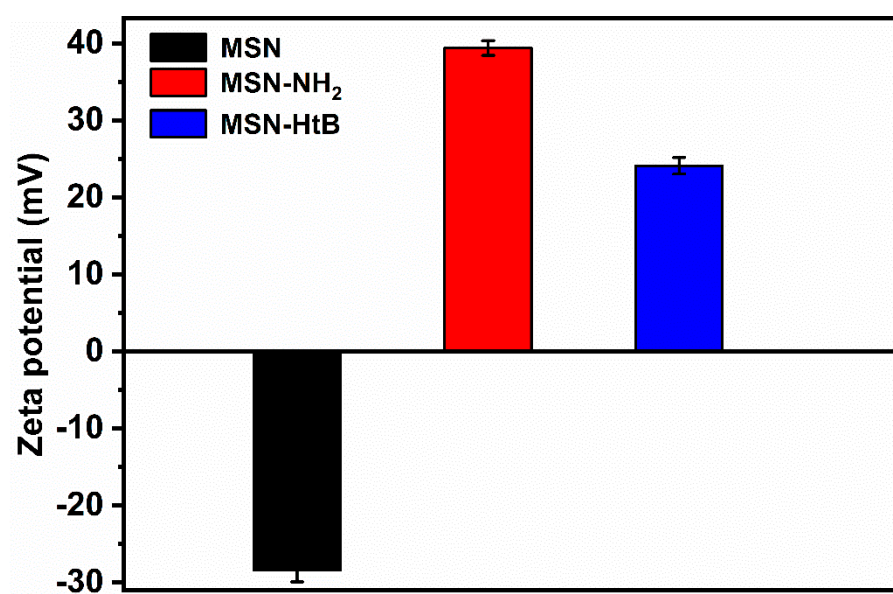

**Figure S2.** Zeta potential results of MSN, MSN-NH<sub>2</sub> and MSN-HtB.

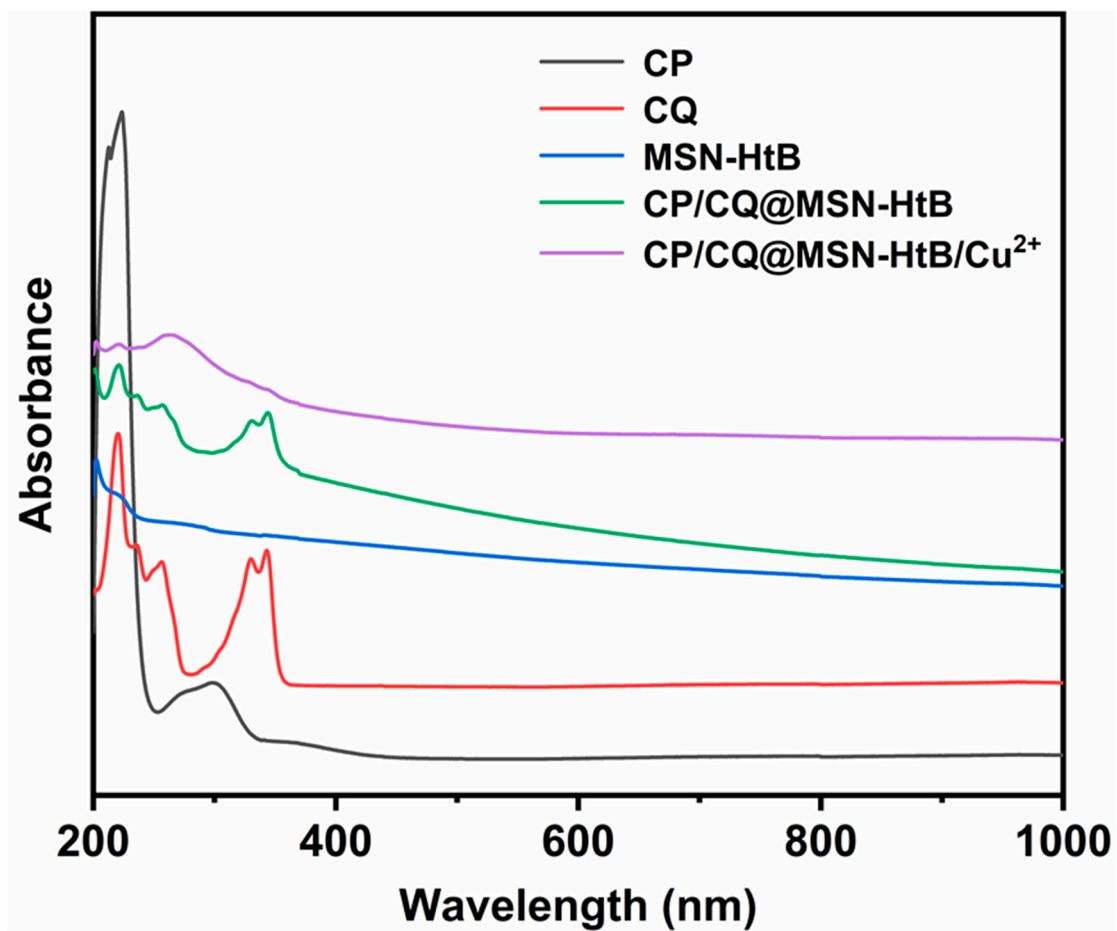

**Figure S3.** UV-Vis absorption spectra of free CP, CQ, MSN-HtB, CP/CQ@MSN-HtB and CP/CQ@MSN-HtB/Cu<sup>2+</sup>.

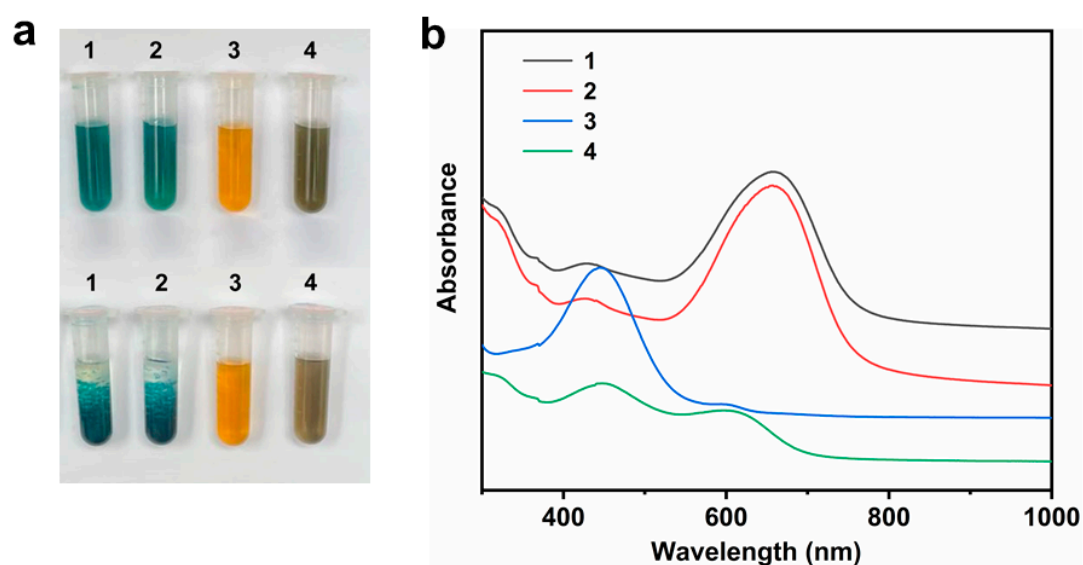

**Figure S4.** (a) Visual detection of chelation between  $\text{Cu}^{2+}$  and the His-tag by PV (top: immediately after the addition of PV; bottom: after standing for 15 min) and (b) the corresponding UV/vis spectra. Sample key: 1. MSN-HtB NPs; 2. HtB peptide; 3. control, without  $\text{CuSO}_4$ ; 4. control, without HtB.

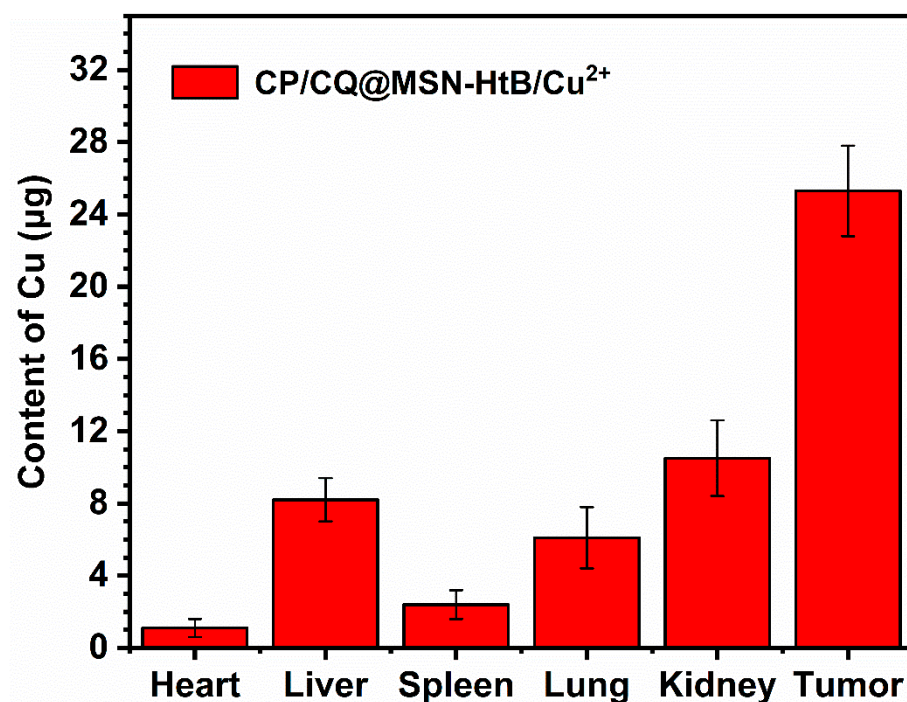

**Figure S5.** Content of Cu in the major organs and tumor after intravenous injection of CP/CQ@MSN-HtB/Cu<sup>2+</sup> NPs.

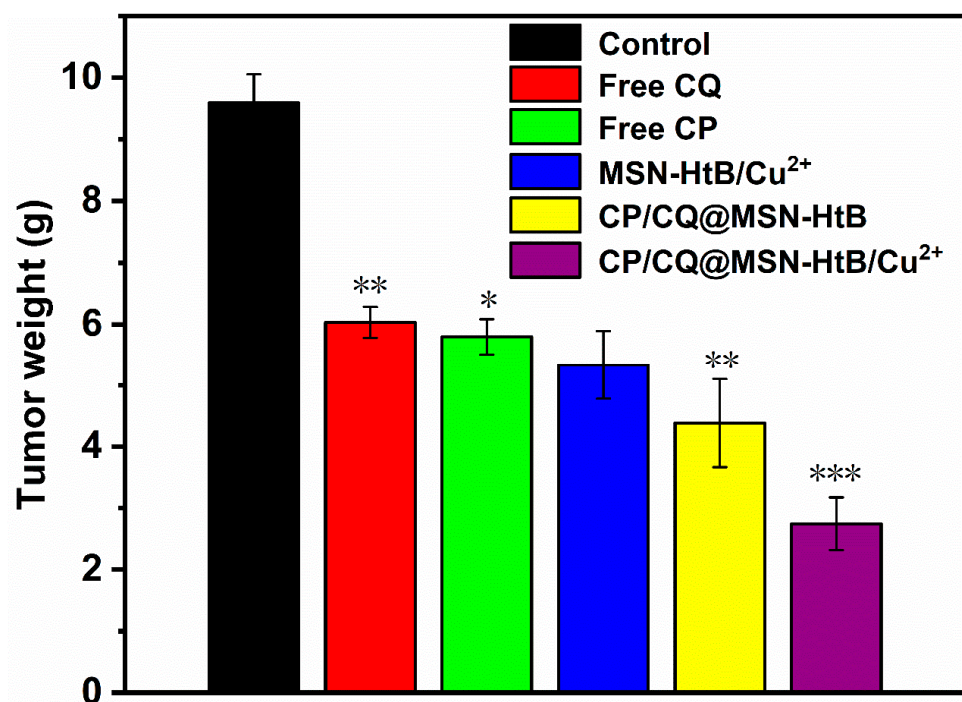

**Figure S6.** The tumor weights after the 12 day *in vivo* experimental period. \*P < 0.05, \*\*P < 0.01, \*\*\*P < 0.001 when compared to the control.



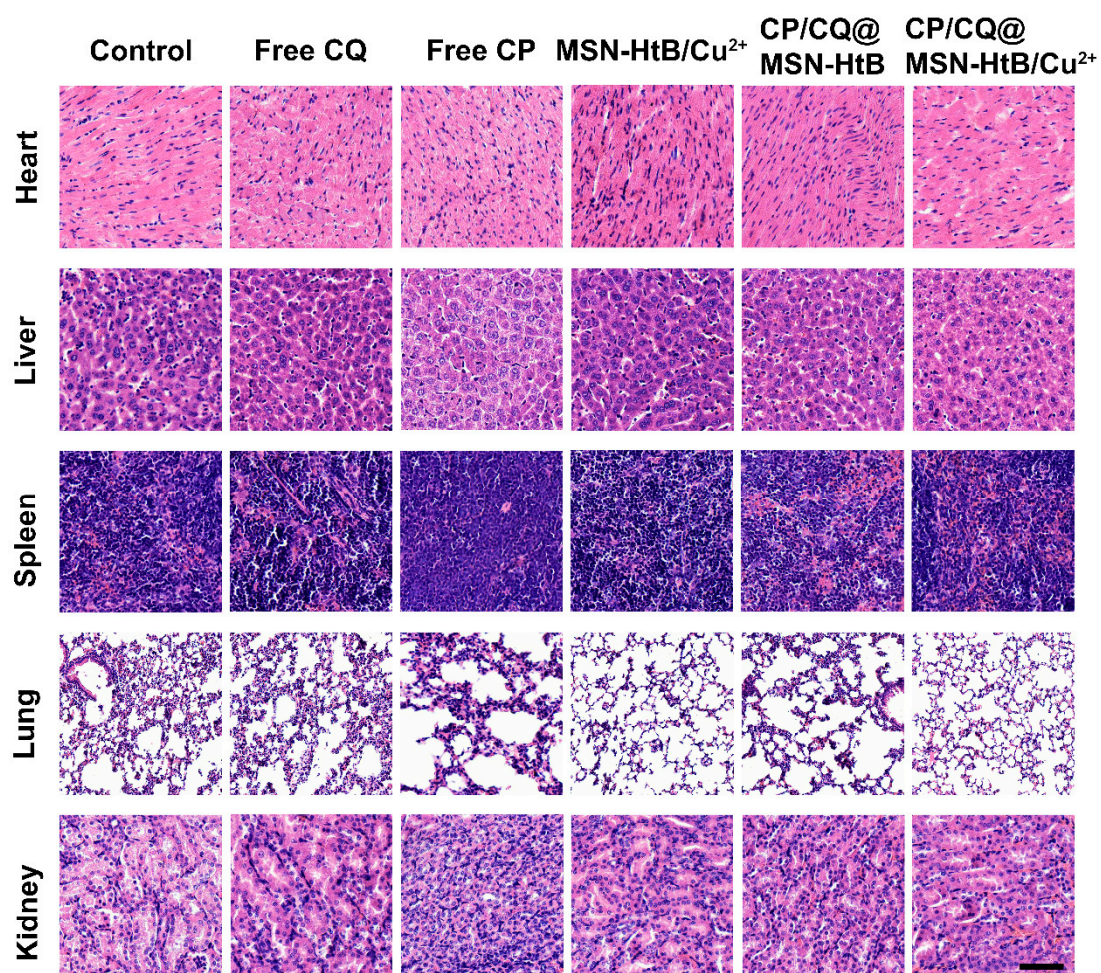

**Figure S7.** H&E staining of major organs from the control and experimental groups. All scale bars are 20  $\mu$ m.
